# Supplementary material for: Tunable fluorescence in chromophore-functionalized nanodiamond induced by energy transfer
Source: Royal Society of Chemistry journal article supplement (doi:10.1039/c1nr10295h), 2011-01-01
Supplement: c1nr10295h.pdf [file c1nr10295h.pdf]

## Supporting Information

### Tunable Fluorescence in Chromophore-Functionalized Nanodiamonds Induced by Energy Transfer

Urmimala Maitra,<sup>a</sup> Ankit Jain,<sup>a</sup> Subi J. George<sup>\*a</sup> and C. N. R. Rao<sup>\*a,b</sup>

<sup>a</sup> New Chemistry Unit, Jawaharlal Nehru Centre for Advanced Scientific Research (JNCASR, Jakkur P.O., Bangalore 560064, India  
Fax: (+91)-80-2208-2760; E-mail: [cnrrao@jncasr.ac.in](mailto:cnrrao@jncasr.ac.in), [george@jncasr.ac.in](mailto:george@jncasr.ac.in)

<sup>b</sup> International Centre for Materials Science (ICMS), CSIR Centre of Excellence in Chemistry, Jawaharlal Nehru Centre for Advanced Scientific Research (JNCASR)

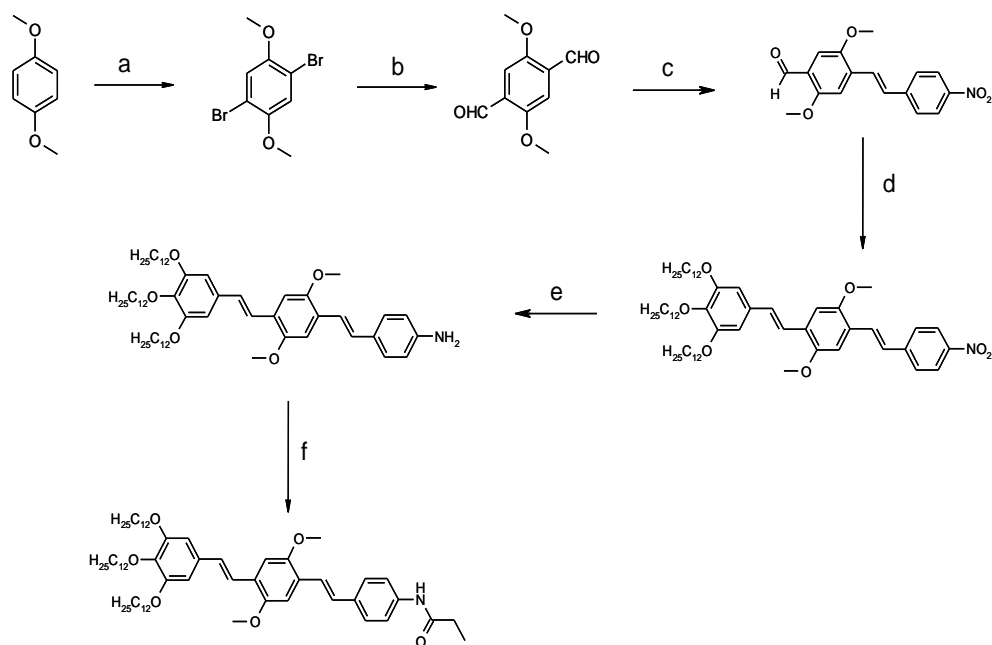

a)  $\text{Br}_2$ , AcOH 70°C, 5 hrs. b) DMF, n-BuLi. c) Nitro Phosphonate, ButOK, THF. d) Gallic Phosphonate, ButOK, THF. e)  $\text{SnCl}_2$  / HCl. f) Propionic Acid, DCM, DCC, DMAP 12 hrs

Fig. S1 Scheme for synthesis of OPV amine and OPV-B.

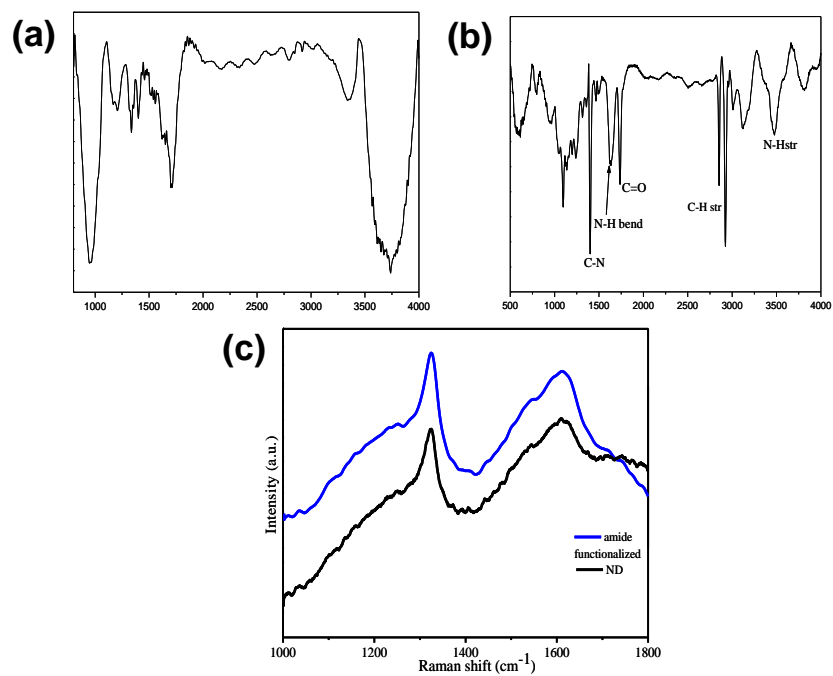

Fig. S2 (a), (b) IR spectra of **OPV-amine** and **OPV-B**, respectively. c) Raman spectra of **ND-acid** and **ND-OPV**.

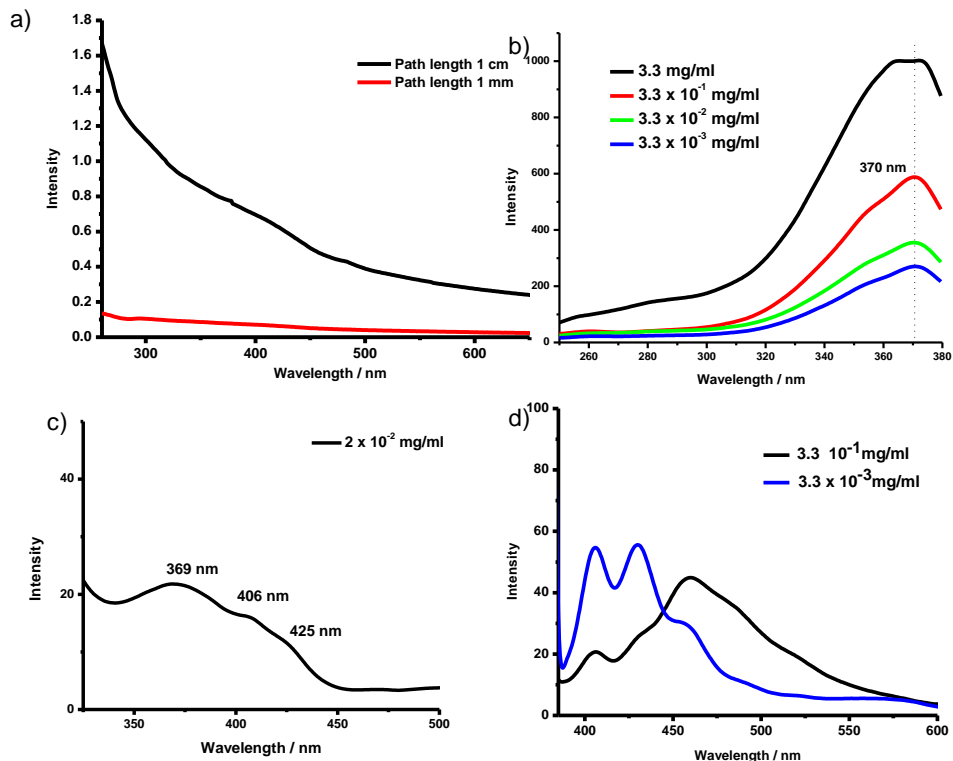

Fig. S3 a) Absorption spectra of **ND-OPV** (1mg/3 ml) in 1 mm and 1 cm cuvettes, b) Concentration dependent excitation spectra of **ND-OA** at 425 nm, 1mm cuvette c) Excitation spectra of **ND-OPV** at 570 nm, 1mm cuvette d) Emission spectra of **ND-OPV** at different concentration, excited at 360 nm, 1 mm cuvette (experiment done at identical slit widths so as to show that the quenching of ND emission is absolute).

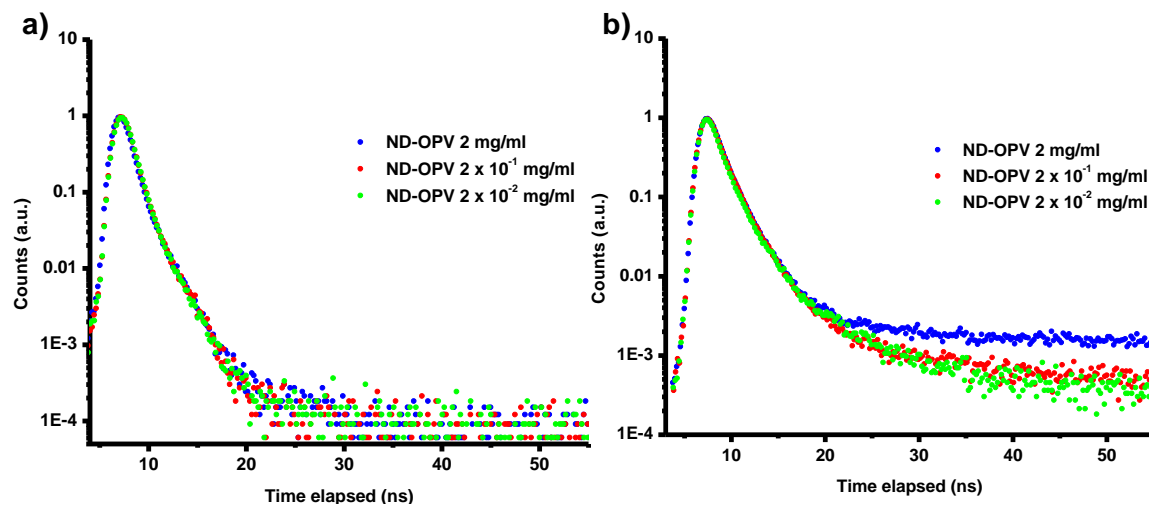

Fig. S4 Time resolved fluorescence decay profiles of **ND-OPV** conjugate in THF monitored (a) 410 nm and (b) 510 nm, excitation wavelength is 355 nm.

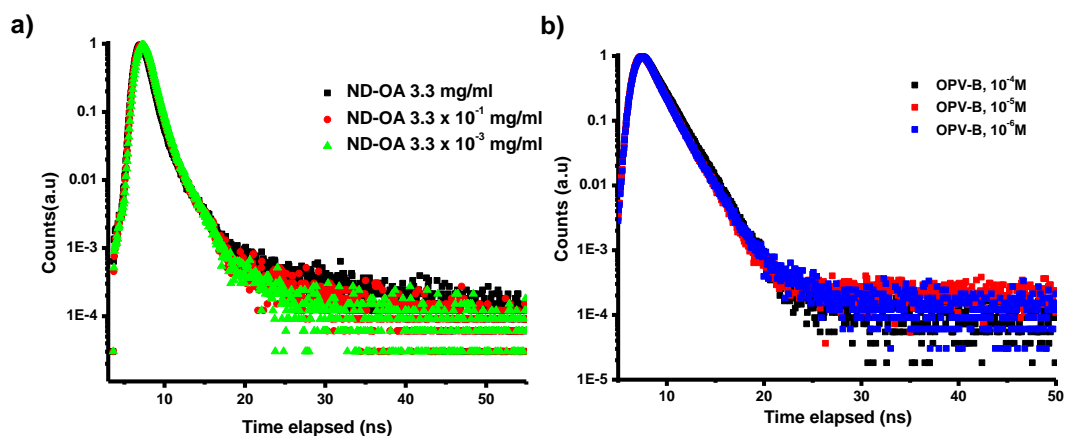

Fig. S5 a) Time resolved fluorescence decay profiles of a) **ND-OA** and b) **OPV-B** in THF monitored at 410 nm 510 nm, respectively, excitation wavelength is 355 nm.

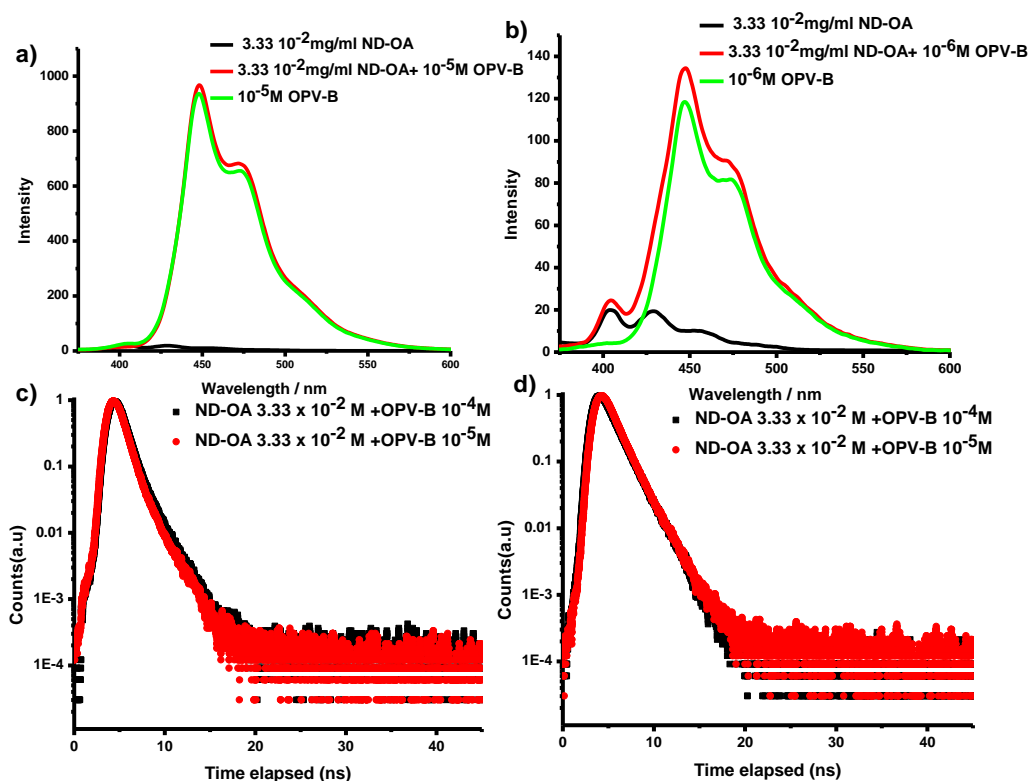

Fig. S6 a), b) Emission Spectra of mixtures of **ND-OA** and various equivalents of **OPV-B** in THF, excitation wavelength is 331 nm. c), d) Time resolved fluorescence decay profiles of mixtures **ND-OA** and **OPV-amide** in THF monitored at 410 nm 510 nm, respectively, excitation wavelength is 355 nm (Choice of concentrations of **OPV-B** and **ND-OA** is taking in consideration of maximum aggregation, interaction ranges, hence showing that there is no interaction even at these values)
